# Supplementary material
Source: PubMed Central journal article supplement (PMC4407472)
Supplement: NIHMS565497-supplement-2.pdf [file NIHMS565497-supplement-2.pdf]

## Supplemental Figure S2

**A**

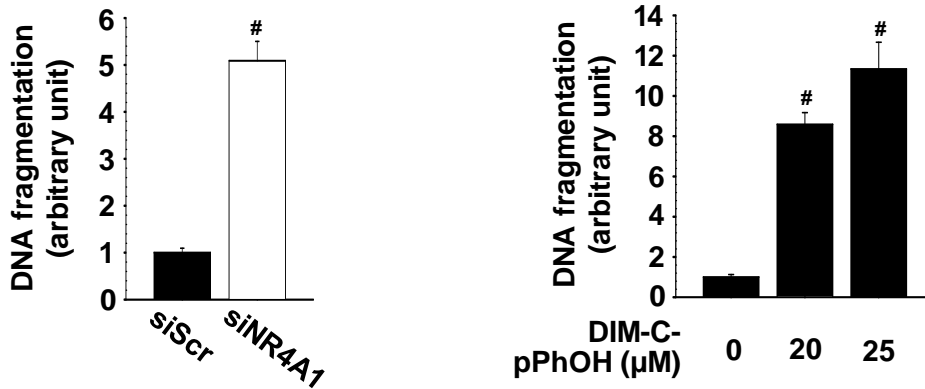

**B**

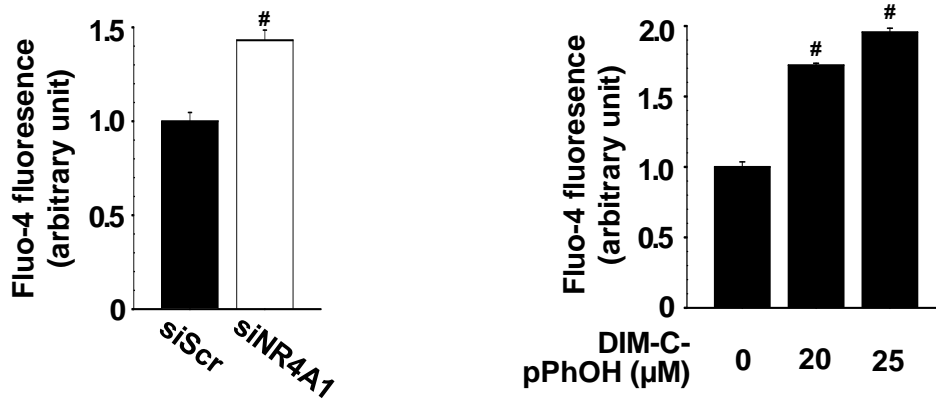

**Supplemental Figure S2. Inactivation of NR4A1 induces DNA fragmentation and ER Ca<sup>2+</sup> release in Panc-1 cells.** (A) After treatment with siRNA for 72 hr or DIM-C-pPhOH for 24 hr, DNA fragmentation assay was performed using the cell lysates as described in Supplemental Materials and methods. (B) After treatment with siRNA for 72 hr or DIM-C-pPhOH for 24 hr, cells were loaded with Fluo-4 NW and cytosolic Ca<sup>2+</sup> levels were measured by reading increased Fluo-4 fluorescence upon binding Ca<sup>2+</sup> in a fluorescence plate reader. #*P*<0.001 vs siScr or DMSO.
