# Supplementary material
Source: PubMed Central journal article supplement (PMC4407472)
Supplement: NIHMS565497-supplement-6.pdf [file NIHMS565497-supplement-6.pdf]

**Supplemental Table 1.** List of real-time PCR primer sequences.

| Gene Name |           | Primers (5' → 3')     |
|-----------|-----------|-----------------------|
| CHOP      | Sense     | CCATCTCTGCAGTTGGATCA  |
|           | Antisense | CCAAAATCAGAGCTGGAACC  |
| GLRX      | Sense     | CACTGCATCCGCCTATACAA  |
|           | Antisense | CAGCCACCAACCACACTAAC  |
| IDH1      | Sense     | CTTTTGGGTTCCGTCACTTG  |
|           | Antisense | GTCGTCATGCTTATGGGGAT  |
| TBP       | Sense     | TGCACAGGAGCCAAGAGTGAA |
|           | Antisense | CACATCACAGCTCCCCACCA  |
| TXNDC5    | Sense     | TGCAGTCCACTTTAGCCACA  |
|           | Antisense | GCACTTCGTCATGTTCTTCG  |
