# Supplementary material
Source: PubMed Central journal article supplement (PMC4407472)
Supplement: NIHMS565497-supplement-7.pdf [file NIHMS565497-supplement-7.pdf]

**Supplemental Table 2.** Proteins showing differential expression in Panc1 cells by transfection of siNR4A1<sup>a</sup>.

|    | Accession number <sup>b</sup> | Protein                                         | Location | Function                   | MW (kD) | PI   | Sequence Coverage | Fold change |
|----|-------------------------------|-------------------------------------------------|----------|----------------------------|---------|------|-------------------|-------------|
| 1  | P07237                        | Protein disulfide-isomerase A1                  | ER       | Chaperone                  | 57      | 4.8  | 18                | 1.5         |
| 2  | P11021                        | BiP protein (GRP78)                             | ER       | Chaperone                  | 72      | 5.0  | 11                | 3.5         |
| 3  | B7Z841                        | Neural cell adhesion molecule 2                 | CM       | Cell adhesion              | 47      | 5.0  | 10                | 2.5         |
| 4  | Q9UKZ4                        | Tenascin-M1                                     | CM       | Signal transduction        | 30      | 6.0  | 12                | 2.2         |
| 5  | P30101                        | Disulfide isomerase ER-60 (ERp60)               | ER       | Chaperone                  | 54      | 5.6  | 26                | 2           |
| 6  | Q59GC9                        | Syntaxin binding protein 1                      | CM       | Unknown                    | 47      | 6.1  | 9                 | 1.6         |
| 7  | P00558                        | Phosphoglycerate kinase 1 (PGK1)                | C        | Glycolysis (ATP synthesis) | 44      | 8.3  | 26                | 0.6         |
| 8  |                               | HCG1775343                                      | UN       | Unknown                    | 6       | 11.9 | 25                | 0.45        |
| 9  | Q92851                        | Heat shock 10kDa protein 1                      | C        | Apoptosis                  | 13      | 9.5  | 30                | 0.4         |
| 10 | A0N4V7                        | HCG2039797                                      | UN       | Unknown                    | 2       | 9.8  | 38                | 0.55        |
| 11 | P35232                        | Prohibitin                                      | M        | DNA synthesis              | 29      | 5.6  | 24                | 1.5         |
| 12 | P23528                        | Cofilin-1                                       | C        | Anti-apoptosis             | 18      | 8.2  | 21                | 1.5         |
| 13 | Q9H8E5                        | Unnamed protein product                         | UN       | Unknown                    | 23      | 11.0 | 10                | 0.47        |
| 14 | Q96DC8                        | Enoyl-CoA hydratase domain-containing protein 3 | M        | Catalytic activity         | 24      | 8.3  | 10                | 0.48        |
| 15 | Q06830                        | Peroxiredoxin-1                                 | C        | Antioxidant                | 22      | 8.3  | 33                | 0.6         |
| 16 | Q9Y2B7                        | Unnamed protein product                         | UN       | Unknown                    | 22      | 8.9  | 11                | 0.45        |
| 17 | P10809                        | 60 kDa heat shock protein, mitochondrial        | M        | Chaperone                  | 61      | 5.7  | 58                | 1.8         |
| 18 | P60709                        | Actin, cytoplasmic 1                            | C        | Structural constituent     | 42      | 5.3  | 28                | 2           |

|    | <b>Accession number<sup>b</sup></b> | <b>Protein</b>                                               | <b>Location</b> | <b>Function</b>                       | <b>MW (kD)</b> | <b>PI</b> | <b>Sequence Coverage</b> | <b>Fold change</b> |
|----|-------------------------------------|--------------------------------------------------------------|-----------------|---------------------------------------|----------------|-----------|--------------------------|--------------------|
| 19 | P22626                              | Heterogeneous nuclear ribonucleoproteins A2/B1               | N               | mRNA processing                       | 36             | 8.7       | 30                       | 0.5                |
| 20 | P45880                              | VDAC-2 (porin)                                               | M               | Transport                             | 38             | 6.3       | 35                       | 0.5                |
| 21 | P45880                              | VDAC-2 (porin)                                               | M               | Transport                             | 38             | 6.3       | 20                       | 0.5                |
| 22 | Q01151                              | CD83 antigen                                                 | CM              | Signal transduction                   | 24             | 7.6       | 4                        | 0.5                |
| 23 | Q4JM62                              | Envelope protein                                             | UN              |                                       | 42             | 8.7       | 10                       | 0.6                |
| 24 | P14866                              | Heterogeneous nuclear ribonucleoprotein L                    | N               | Ribonucleo-protein                    | 60             | 6.7       | 15                       | 0.54               |
| 25 | P06733                              | Alpha-enolase isoform 1                                      | C               | Repressor                             | 47             | 7.0       | 32                       | 0.5                |
| 26 | O95460                              | Matrilin-4                                                   | S               | Protein binding                       | 54             | 5.5       | 10                       | 0.3                |
| 27 | P22626                              | Heterogeneous nuclear ribonucleoproteins A2/B1 isoform B1    | N               | mRNA processing                       | 37             | 9.0       | 17                       | 0.45               |
| 28 | P24752                              | Mitochondrial Acetoacetyl-CoA Thiolase                       | M               | Acyltransferase                       | 41             | 8.2       | 14                       | 0.5                |
| 29 | Q9NZ23                              | Gastric-associated differentially-expressed protein YA61P    | UN              | Oxidoreduc-tase activity              | 14             | 6.8       | 19                       | 0.44               |
| 30 | P22626                              | Heterogeneous nuclear ribonucleoproteins A2/B1 isoform A2    | N               | mRNA processing                       | 36             | 8.7       | 13                       | 0.5                |
| 31 | Q8WVY7                              | Ubiquitin-like domain-containing CTD phosphatase 1           | N               | phosphopro-tein phosphata-se activity | 37             | 6.3       | 10                       | 2.3                |
| 32 | P00367                              | Chain A, Structure of Human Glutamate Dehydrogenase-Apo Form | M               | Oxidoreduc-tase                       | 56             | 6.7       | 14                       | 0.44               |
| 33 | P09622                              | Dihydrolipoamide dehydrogenase precursor                     | M               | Oxidoreduc-tase                       | 54             | 8.2       | 11                       | 0.56               |

|    | <b>Accession number<sup>b</sup></b> | <b>Protein</b>                                          | <b>Location</b> | <b>Function</b>      | <b>MW (kD)</b> | <b>PI</b> | <b>Sequence Coverage</b> | <b>Fold change</b> |
|----|-------------------------------------|---------------------------------------------------------|-----------------|----------------------|----------------|-----------|--------------------------|--------------------|
| 34 | Q65ZQ3                              | Heterogeneous nuclear ribonucleoprotein A3 pseudogene 1 | N               | Nucleic acid binding | 29             | 8.5       | 9                        | 0.4                |
| 35 | Q969X6                              | Unnamed protein product                                 | N               | Protein binding      | 77             | 9.0       | 9                        | 0.4                |
| 36 | P25705                              | ATP synthase subunit alpha (ATP5A1)                     | M               | ATP synthesis        | 59             | 9.2       | 10                       | 0.45               |
| 37 | Q9H2K8                              | STE20-like kinase                                       | C               | DNA repair           | 106            | 7.5       | 10                       | 0.6                |
| 38 | B4DNH8                              | Annexin A2                                              | C               | Angiogenesis         | 21             | 6.0       | 25                       | 0.6                |

<sup>a</sup> Cells were analyzed 60 hr post-transfection with each siRNA.

<sup>b</sup> The Swiss-Prot/TrEMBL database accession number.

CM: cell membrane, ER: endoplasmic reticulum, M: mitochondria, N: nucleus, C: cytoplasm, S: secreted, UN: unknown.
